# Supplementary material for: Cis-regulation of microRNA expression by scaffold/matrix-attachment regions
Source: PubMed Central journal article supplement — Nucleic Acids Res. 2011 May 17;39(16):6908–18. doi: 10.1093/nar/gkr303 (PMC3167628; doi:10.1093/nar/gkr303), 2011-05-17
Supplement: supp_gkr303_Revised_Supplementary_material.pdf [file supp_gkr303_Revised_Supplementary_material.pdf]

Supplementary Figure 1

a) hsa-let-7b

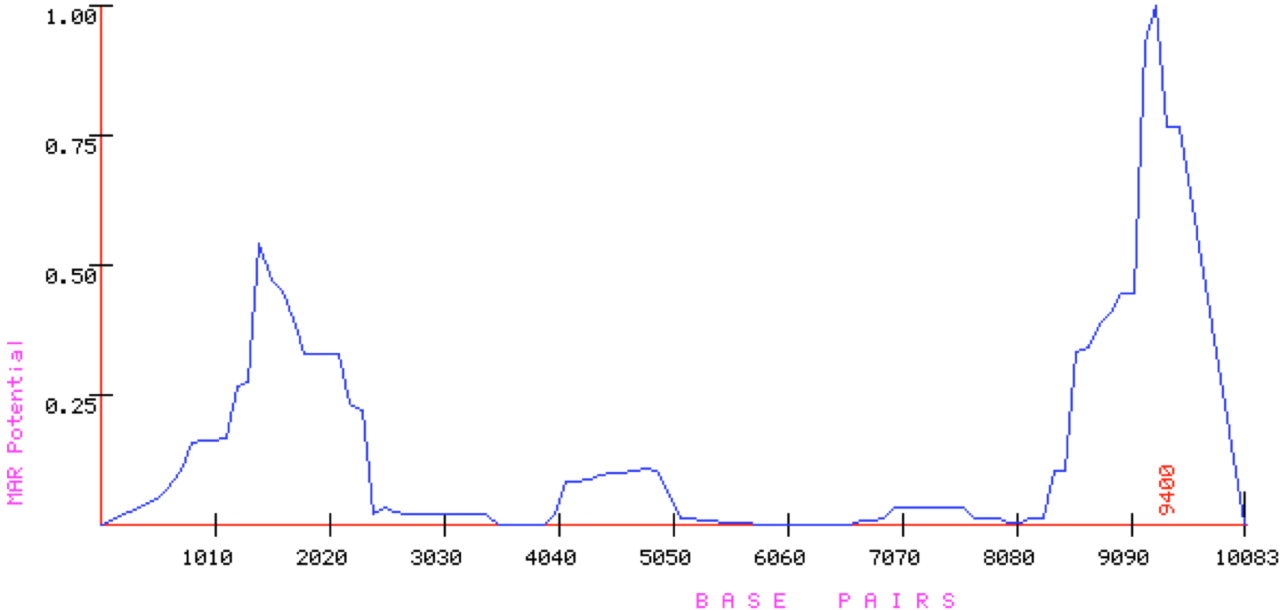

b) hsa-miR-17

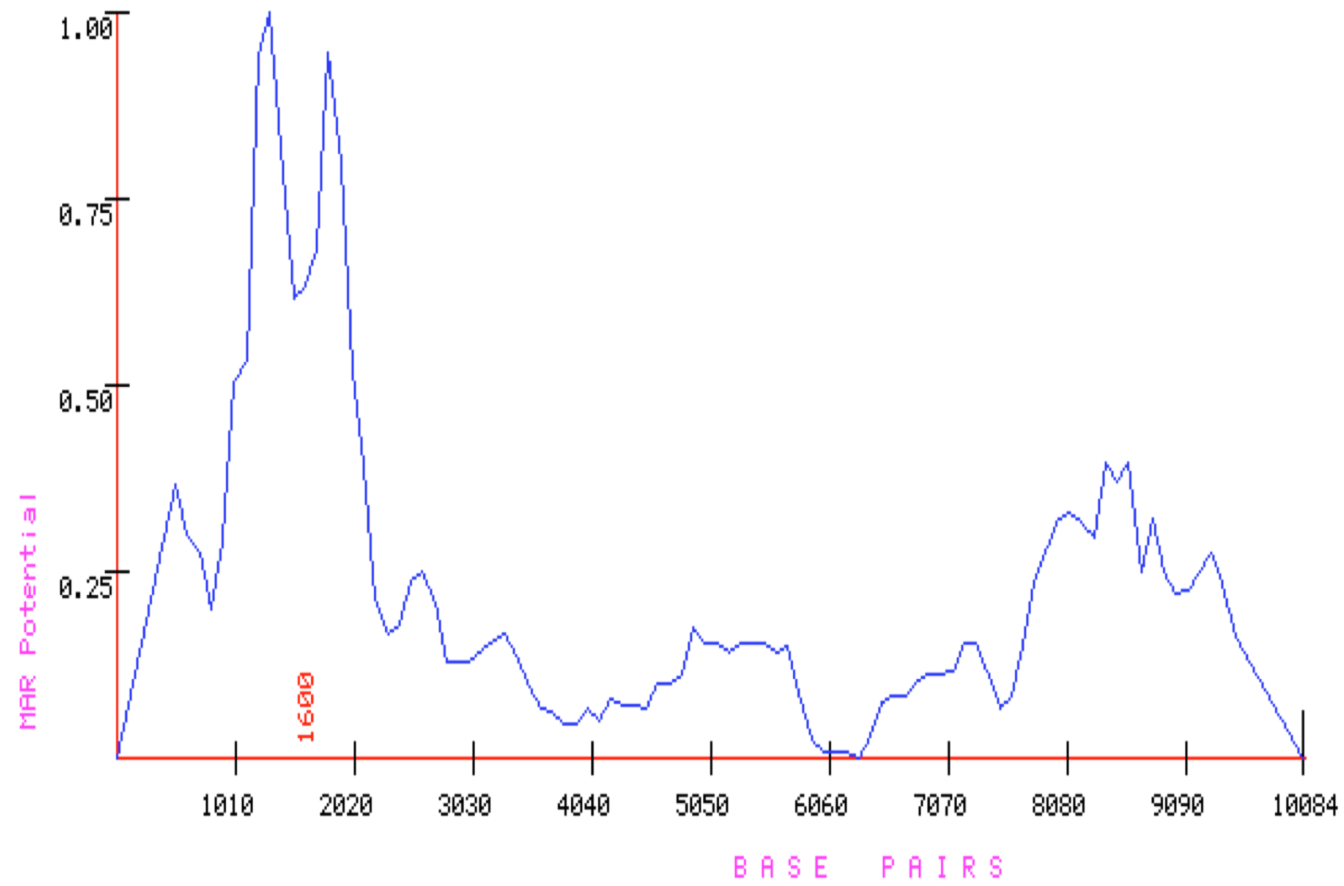

c) hsa-miR-93

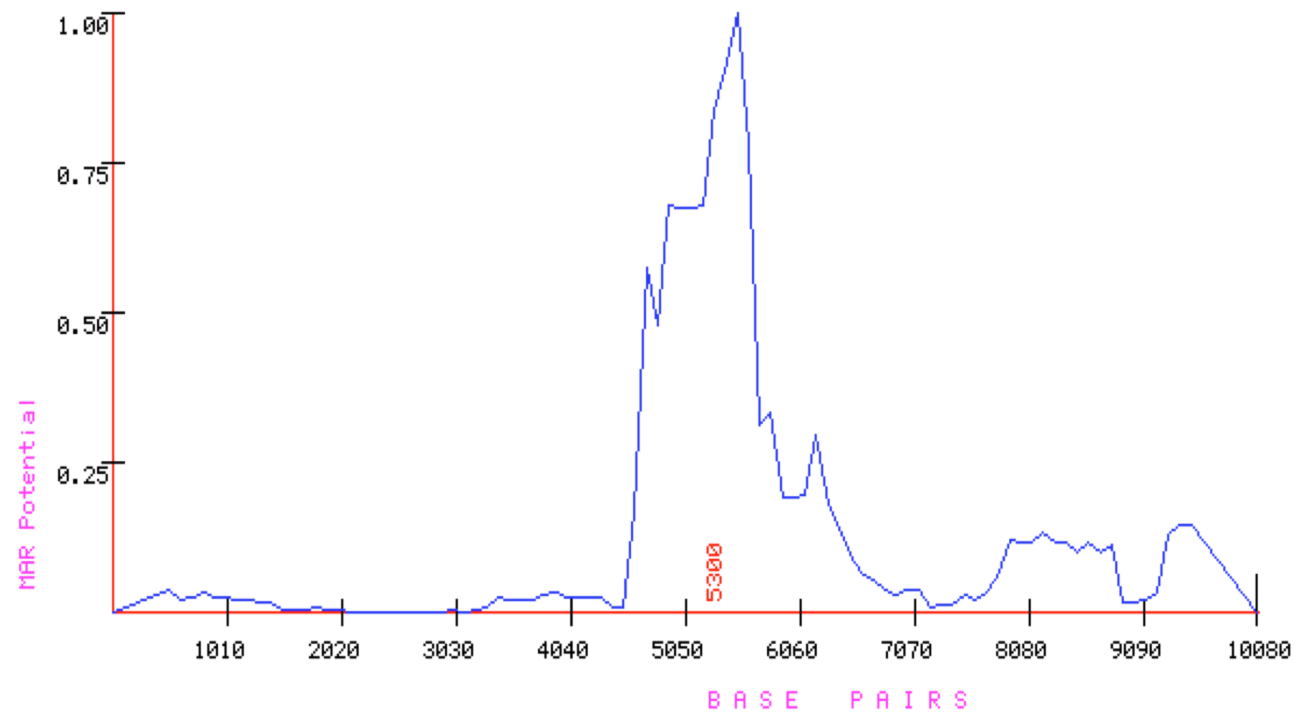

d) hsa-miR-221

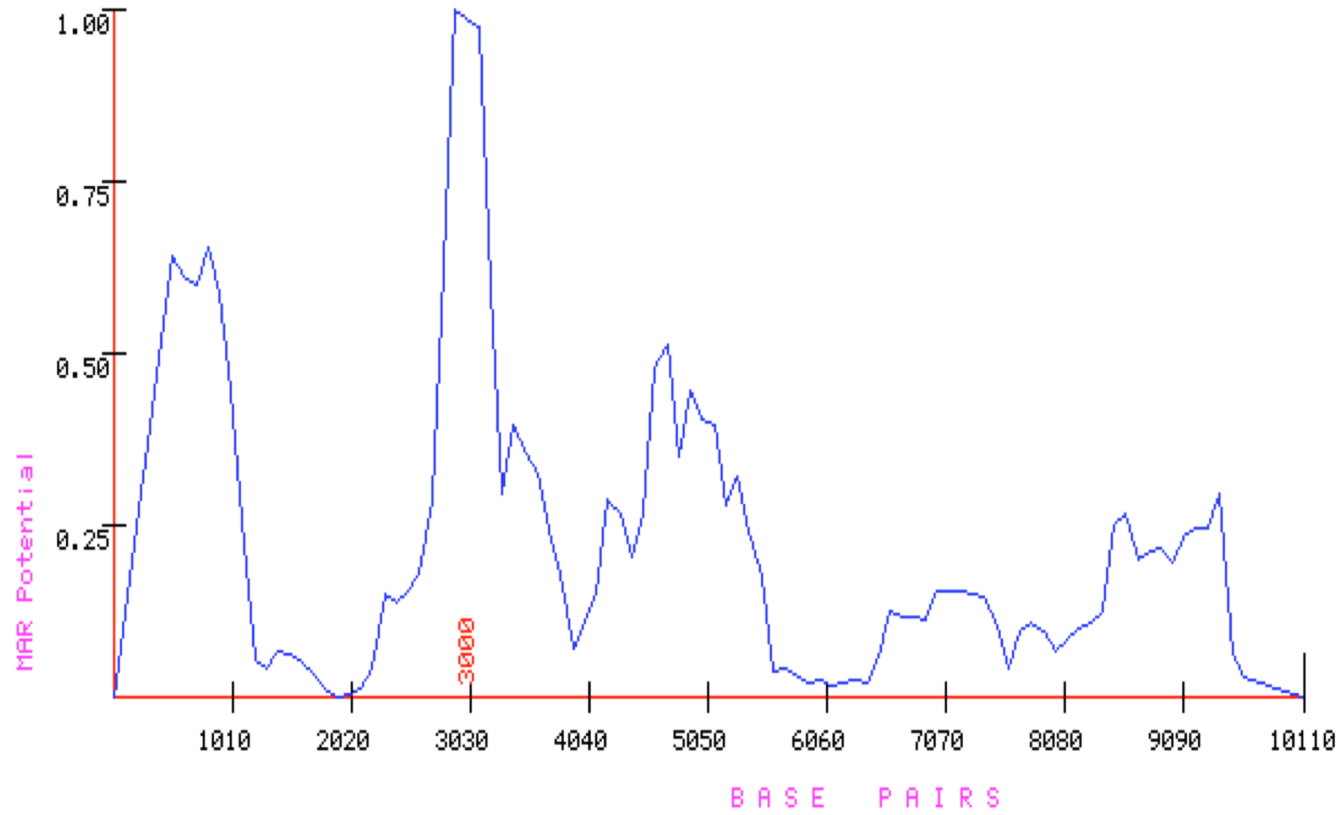

Prediction of putative MARs (peak position indicated in red) upstream of each of the miRNAs aberrantly expressed in neuroblastoma.

## Supplementary Figure 2

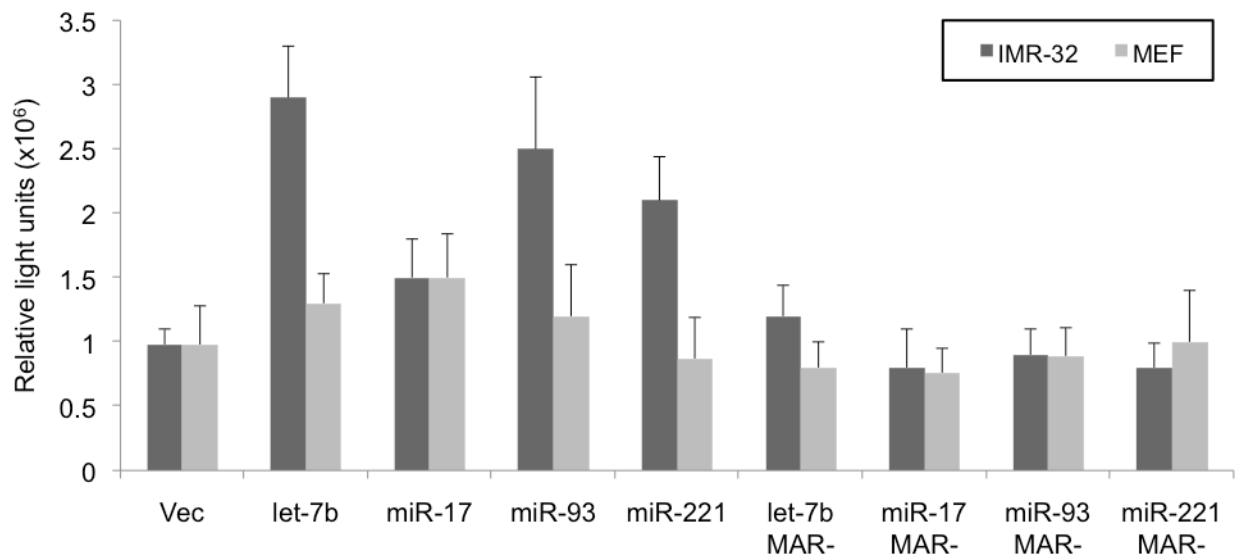

Luciferase reporter assays were performed in IMR-32 or MEF cells employing 1  $\mu$ g PGL2 constructs, where MAR elements from each of the indicated miRNAs were cloned upstream of luciferase gene. In a control experiment, the encompassing regions excluding the core MAR element (MAR-) were cloned upstream of luciferase gene to check for reporter activity. We seeded  $1 \times 10^5$  cells in 24 well plates, co-transfected them with GFP and 1  $\mu$ g of luciferase plasmids. We performed luciferase assays 48h post-transfection. Briefly, cells were washed once in 1X PBS and collected by centrifugation at 2500 rpm. The pellet was lysed in 1X passive lysis buffer on ice and after centrifugation at 13000 rpm for 10 min, protein was estimated. Equal amount of protein (100  $\mu$ g) was used to perform the reporter assay using Dual reporter luciferase assay kit (Promega). Samples were loaded in duplicates and repeated as three individual experiments, to evaluate the fold increase in the reporter activity.
